1 **Endocrine regulation of carbonate precipitate formation in marine fish intestine**  
2 **by Stanniocalcin and PTHrP**

3

4 Sílvia F. Gregório, Edison S.M. Carvalho, Marco A. Campinho, Deborah M. Power,  
5 Adelino V.M. Canário and Juan Fuentes<sup>†</sup>

6

7

8

9

10 Centre of Marine Sciences (CCMar), Campus de Gambelas, Universidade do Algarve,  
11 8005-139 Faro, Portugal.

12

13

14

15

16

17 **Running head title:** Hormones and intestinal precipitates

18

19

20 <sup>†</sup>Author for correspondence:

21

Juan Fuentes (jfuentes@ualg.pt)

22

CCMar,

23

Campus de Gambelas,

24

Universidade do Algarve

25

8005-139 Faro, Portugal

26

Tel: +0035289800900 X 7375

27

## SUMMARY

28  
29 In marine fish, high epithelial bicarbonate secretion by the intestine generates luminal  
30 carbonate precipitates of divalent cations that play a key role in water and ion  
31 homeostasis. *In vitro* studies highlight the involvement of the calciotropic hormones  
32 PTHrP (Parathyroid hormone related protein) and stanniocalcin (STC) in the regulation  
33 of epithelial bicarbonate transport. The present study tests the hypothesis that  
34 calciotropic hormones have a regulatory role in carbonate precipitate formation *in vivo*.  
35 To test this hypothesis sea bream (*Sparus aurata*) juveniles received single  
36 intraperitoneal injections of piscine PTHrP(1-34), the PTH/PTHrP receptor antagonist  
37 PTHrP(7-34), purified sea bream STC or were passively immunized with polyclonal  
38 rabbit antisera raised against sea bream STC (STCAb). Endocrine effects on the  
39 expression of the basolateral sodium bicarbonate co-transporter (Slc4a4.A), the apical  
40 anion exchangers (Slc26a6.A and Slc26a3.B) and the V-type proton pump beta subunit  
41 (Atp6v1b) in the anterior intestine were evaluated. In keeping with their calciotropic  
42 nature the hypocalcemic factors PTHrP(7-34) and STC up-regulated gene expression of  
43 all transporters. In contrast, the hypercalcemic factor PTHrP(1-34) and STC antibodies  
44 down-regulated transporters involved in the bicarbonate secretion cascade. Changes in  
45 intestine luminal precipitate contents provoked by calcaemic endocrine factors validated  
46 these results. 24 hours post-injection either PTHrP(1-34) or immunization with STCAb  
47 reduced the content of carbonate precipitates in the intestine of the sea bream. In  
48 contrast, the PTH/PTHrP receptor antagonist PTHrP(7-34) increased not only the  
49 precipitated fraction, but also the concentration of  $\text{HCO}_3^-$  equivalents in the intestinal  
50 fluid. These results confirm the hypothesis that calciotropic hormones have a regulatory  
51 role in carbonate precipitate formation *in vivo* in the intestine of marine fish.  
52 Furthermore, they illustrate for the first time in fish the counter-acting effect of PTHrP  
53 and STC and reveal an unexpected contribution of calcemic factors to acid-base balance.

54  
55 **Key words:** intestinal physiology, calcium regulation, bicarbonate secretion, ion  
56 transporter, endocrine regulation, calciotropic hormones

57

## INTRODUCTION

58

59 Marine teleosts sustain an ionic equilibrium with seawater to keep their plasma  
60 osmolality within narrow limits. To achieve this, the gills remove excess salts from the  
61 body (Evans et al., 2005), in a secretion process that indirectly causes water loss.  
62 Therefore, water replacement by drinking becomes essential to sustain ion regulation  
63 (Fuentes and Eddy, 1997a). In addition to regulation of the amount of water ingested by  
64 endocrine and environmental factors (Fuentes et al., 1996; Fuentes and Eddy, 1997a;  
65 Fuentes and Eddy, 1997b; Guerreiro et al., 2004; Guerreiro et al., 2001), the processing  
66 of imbibed fluid has a major impact in fish ion regulation. Ingested water is first  
67 processed in the esophagus where it undergoes selective absorption of NaCl (Hirano  
68 and Mayer-Gostan, 1976; Parmelee and Renfro, 1983), which lowers fluid osmolality,  
69 and is believed to enhance water absorption in the intestine.

70 Essential to intestinal fluid processing, and thus intestinal water absorption, is the  
71 production of luminal divalent carbonate precipitates in marine teleosts (Grosell, 2006;  
72 Grosell, 2011; Kurita et al., 2008; Walsh et al., 1991; Wilson et al., 2002). Luminal  
73 precipitate formation requires high concentrations of divalent ions and a chemically  
74 favorable high pH. The high divalent ion content required for precipitate formation is  
75 supplied by the high calcium content of imbibed seawater, that reaches the intestine in a  
76 concentration range that varies between 3-15 mM depending on the species (Fuentes et  
77 al., 2006; Genz et al., 2011; Grosell et al., 2001; Wilson et al., 2002). The alkaline pH  
78 of the luminal fluid that provides a favorable chemical environment for carbonate  
79 precipitation results from high rates of epithelial  $\text{HCO}_3^-$  secretion by the enterocytes  
80 (Grosell, 2006; Grosell, 2011)

81 Mechanisms for epithelial  $\text{HCO}_3^-$  secretion are dependent on luminal  $\text{Cl}^-$  and involve  
82 apical  $\text{Cl}^-/\text{HCO}_3^-$  exchangers (Ando and Subramanian, 1990; Grosell et al., 2005;  
83 Wilson et al., 1996), in particular, members of the SLC26 family, that secrete  $\text{HCO}_3^-$   
84 and absorb  $\text{Cl}^-$  (Grosell and Genz, 2006; Grosell et al., 2009b; Kurita et al., 2008). In  
85 addition to apical mechanisms, a basolateral  $\text{Na}^+-\text{HCO}_3^-$  co-transporter (NBC), which  
86 belongs to the SLC4 gene family, leads to accumulation of cellular  $\text{HCO}_3^-$  to fuel apical  
87 secretion (Kurita et al., 2008; Taylor et al., 2010). Furthermore, a Bafilomycin-sensitive  
88  $\text{H}^+$  pump participates in the regulation of apical  $\text{HCO}_3^-$  secretion in seawater adapted  
89 rainbow trout and Gulf toadfish (Grosell et al., 2009a; Guffey et al., 2011) and is also

90 important for regional specialization of fluid processing in the sea bream intestine  
91 (Gregorio et al., 2013) .

92 Calcium as well as  $\text{HCO}_3^-$  immobilization in the luminal carbonate precipitates, results  
93 in reduced fluid osmolality and favors water absorption. Therefore,  $\text{HCO}_3^-$  secretion in  
94 marine fish intestine drives not only luminal precipitate formation, but also water  
95 absorption (Grosell, 2011). In keeping with this suggestion, a recent study in the Gulf  
96 toadfish demonstrated a role for the  $\text{HCO}_3^-$ -sensing soluble adenylyl cyclase (sAC) in  
97 intestinal water absorption (Tresguerres et al., 2010), a process also occurring in the sea  
98 bream intestine (Carvalho et al., 2012).

99 The importance of fish intestinal carbonate precipitate production in the ocean carbon  
100 cycle has recently been highlighted (Wilson et al., 2009) and brings a new dimension to  
101 the ecophysiology of fish and their environment. The endocrine factors that regulate  
102 drinking, fluid processing, epithelial  $\text{HCO}_3^-$  secretion and precipitate production require  
103 more detailed study. *In vitro* studies have revealed that the calciotropic hormones STC  
104 (stanniocalcin) and PTHrP (Fuentes et al., 2010) regulate not only calcium transport,  
105 but also the epithelial rate of  $\text{HCO}_3^-$  secretion in sea bream. Prolactin (Ferlazzo et al.,  
106 2012) and both trans-membrane and soluble adenylyl cyclases participate in the  
107 regulation of intestinal epithelial  $\text{HCO}_3^-$  secretion (Carvalho et al., 2012) and  
108 hypercalcemic PTHrP regulates drinking rates *in vivo* in sea bream larvae (Guerreiro et  
109 al., 2001) and intestinal calcium transport *in vitro* (Fuentes et al., 2006). Taken together  
110 the results from *in vitro* studies support a role for the calciotropic hormones, STC and  
111 PTHrP, in processing of intestinal fluid in marine fish. Therefore, the objectives of the  
112 present study were to establish the relative importance of the calciotropic hormones  
113 PTHrP and STC, i) in the regulation of the main molecular mechanisms SLC26a6,  
114 SLC26a3, SLC4a4 and Atp6v1b involved in epithelial  $\text{HCO}_3^-$  secretion in the intestine  
115 of the sea bream, and ii) establish their physiological relevance in intestinal precipitate  
116 formation *in vivo*.

117

## 118 **RESULTS**

### 119 **Western blot**

120 Western blot analysis of sea bream serum with an antibody generated against purified  
121 sea bream STC identified a single immunoreactive band (Figure 1). The apparent size of

122 the immunoreactive band under denaturing reducing conditions is 3 kDa smaller than the  
123 purified STC (26kDa). This apparent disparity in size is likely related to the removal of  
124 the signal peptides of 30 amino acids in the N-terminus of stanniocalcin as previously  
125 described for other fish species (Amemiya et al., 2006; Amemiya et al., 2002). Pre-  
126 absorption of the sea bream anti-STC sera with a protein extract of isolated Stannius  
127 corpuscles ablated the immunoreactive band obtained in western blots of serum and  
128 purified STC and confirms antisera specificity.

129

130

### **Immunohistochemistry**

131 STC immunoreaction (Figure 2) was restricted to the corpuscles of Stannius and no  
132 immunoreaction was detected in the adjacent kidney (Figure 2A, D). Moreover, the  
133 immunoreaction was restricted to the cell cytoplasm (Figure 2E). No immunoreaction  
134 was obtained when antisera pre-absorbed with extracts of the corpuscles of Stannius  
135 was used (Figure 2C, F).

136

137

### **Plasma calcium**

138 Intra-peritoneal injections of PTHrP(1-34) alone, STC antisera alone or a combination  
139 of both treatments induced comparable significant increases in circulating plasma  
140 calcium in sea bream juveniles 24 hours post-injection (Figure 3A).

141 Intra-peritoneal injections of the PTHrP receptor antagonist PTHrP(7-34) alone or STC  
142 alone resulted in absolute plasma calcium levels lower than those of the controls, but the  
143 effect was not significant (Figure 3B). However, intra-peritoneal injection of PTHrP(7-  
144 34) and STC combined as a single treatment significantly reduced plasma calcium in  
145 sea bream juveniles (Figure 3B).

146

### **qPCR**

147 Intra-peritoneal injections of PTHrP(1-34) alone, STC antisera alone or a combination  
148 of both treatments induced comparable significant decreases in the expression of all  
149 genes analyzed i.e. SLC4a4, Atp6v1b, SLC26a3 and SLC26a6 in the anterior intestine  
150 of sea bream juveniles 24 hours post-injection (Figure 4).

151 Intra-peritoneal injections of the PTHrP receptor antagonist PTHrP(7-34) alone or in  
152 combination with STC resulted in a significant increase in the expression of SLC4a4,  
153 Atp6v1b, SLC26a3 and SLC26a6 in the anterior intestine of sea bream juveniles 24

154 hours post-injection (Figure 5). However, no significant effects were achieved in  
155 response to STC alone, although the general trend was an increase in the expression of  
156 all transporters (Figure 5).

157

### 158 **Intestinal luminal fluid and precipitate analysis**

159  $\text{HCO}_3^-$  concentration in the intestinal fluid of control fish averaged 45 mEqv  $\text{l}^{-1}$   
160 (Figure 6) and the total carbonate in the precipitate expressed as the average of  
161  $\text{CaCO}_3 + \text{MgCO}_3$  was in the order of 350 nEqv/gram of body mass in control fish.  
162 Intra-peritoneal injections of PTHrP(1-34) alone resulted in a trend for lower levels of  
163  $\text{HCO}_3^-$  in the intestinal fluid and a significant decrease of total carbonate content in the  
164 intestinal precipitate fraction (Figure 6). In contrast, intra-peritoneal injections of the  
165 PTHrP receptor antagonist PTHrP(7-34) resulted in a significant increase in  $\text{HCO}_3^-$  in  
166 the intestinal fluid and in total carbonate content of the intestinal precipitate (Figure 6).  
167 Additionally, intra-peritoneal injection of STC antibodies significantly decreased  $\text{HCO}_3^-$   
168 in the intestinal fluid and total carbonate content of the intestinal precipitate. A STC  
169 treatment alone was omitted as insufficient purified native sea bream STC was available  
170 to treat sea bream juveniles of 20-25 gram of body mass.

171

### 171 **DISCUSSION**

172 The present study establishes *in vivo* effects of the calciotropic hormones, PTHrP and  
173 STC, on the mechanisms of carbonate precipitation in the sea bream intestine. This  
174 claim is based on the fact that the hypercalcemic or hypocalcemic factors: 1) regulate in  
175 a reproducible manner key molecular mechanisms involved in the epithelial  $\text{HCO}_3^-$   
176 secretion cascade; 2) the regulatory effect is predictable; and 3) they modify luminal  
177 intestinal bicarbonate/carbonate contents both in the intestinal fluid and the precipitate  
178 fraction.

179 In a previous study (Fuentes et al., 2010) the *in vitro* actions of PTHrP(1-34) and STC  
180 in the regulation of epithelial  $\text{HCO}_3^-$  secretion in the intestine of the sea bream was  
181 revealed. To extend the *in vitro* results to an *in vivo* situation both PTHrP(1-34) and the  
182 receptor antagonist PTHrP(7-34), which has an established bioactivity in sea bream *in*  
183 *vivo* (Fuentes et al., 2007a), was utilized. The effect of the receptor antagonist PTHrP(7-  
184 34) on epithelial  $\text{HCO}_3^-$  secretion *in vivo* indicates the effects of PTHrP(1-34) on  
185 epithelial  $\text{HCO}_3^-$  secretion in the intestine is through one of the 3 previously

186 characterized teleost PTH receptors. The STC receptor(s) sequence(s) remain  
187 unidentified, which consequently precludes the design of receptor-specific antagonists.  
188 However, a previous study in tilapia (Fenwick and Flik, 1995) revealed that passive  
189 immunization with antibodies against fish STC is a useful tool to uncover the  
190 physiological actions of STC in fish calcium physiology. For this reason specific  
191 polyclonal antibodies raised against the purified native sea bream STC (Fuentes et al.,  
192 2010) that recognize STC in western blotting (Figure 1) and IHC (Figure 2) were used  
193 in the present study. A significant characteristic of this antibody is its ability to modify  
194 plasma calcium levels in the expected direction (increase) within 24 hours of  
195 administration as a single intraperitoneal injection to sea bream juveniles (Figure 3).  
196 This effect is similar to the action of PTHrP(1-34) when administered alone or in  
197 combination with STC antibodies. Together, these results support the idea that  
198 manipulation of plasma calcium can be achieved by administering PTHrP to potentiate  
199 hypercalcaemia, or by inhibition of the hypocalcemic-blocking agent by administration  
200 of STC antibodies. The notion that PTHrP and STC have counter-effects on plasma  
201 calcium regulation was consolidated, by the demonstration that the PTH/PTHrP  
202 receptor antagonist PTHrP(7-34), or purified sea bream STC administered alone failed  
203 to significantly decrease plasma calcium. In contrast, co-administration of both  
204 PTHrP(7-34) and STC significantly decreased plasma calcium levels *in vivo*.  
205 The PTHrP/STC endocrine regulatory system(s) provide alternative mechanisms for the  
206 control of plasma calcium levels, and likely regulates other putative downstream actions  
207 of PTHrP and STC in fish. In this context, both PTHrP and STC have opposite effects  
208 in the regulation of  $\text{HCO}_3^-$  secretion in the intestine of marine fish *in vitro* (Fuentes et al.,  
209 2010). In this intestinal model, the process of apical  $\text{HCO}_3^-$  secretion relies on luminal  
210  $\text{Cl}^-$ , suggesting the involvement of  $\text{Cl}^-/\text{HCO}_3^-$  exchangers (Grosell et al., 2009b; Grosell  
211 et al., 2005; Wilson et al., 1996). Amongst the members of the SLC26 family, SLC26a6  
212 and SCL26a3, were targeted in the present study as they exhibit  $\text{Cl}^-/\text{HCO}_3^-$  exchange  
213 activity (Mount and Romero, 2004). For example, the mefugu SLC26a6 shows high  
214 capacity of  $\text{HCO}_3^-$  transport when expressed in *Xenopus* oocytes (Kurita et al., 2008),  
215 and its expression is salinity dependent in both mefugu (Kurita et al., 2008) and in the  
216 sea bream (Gregorio et al., 2013). There is a limited body of literature describing the  
217 endocrine control of anion exchangers in vertebrates and the present study contributes

218 to this by demonstrating SLC26a6 and SCL26a3 expression is regulated by different  
219 combinations of hypercalcemic or hypocalcemic factors in the anterior intestine of the  
220 sea bream. Thus, hypercalcemic factors (eg. PTHrP(1-34) and passive immunization  
221 with STC antisera) down-regulate the expression of both transporters. Further studies  
222 will be required to establish why STC administration failed to modify SLC26a6 and  
223 SCL26a3 expression but it may be related to the dose of STC given or the already high  
224 levels of STC detected in fish plasma (Mayer-Gostan et al., 1992).

225 A proton pump is present in the marine fish intestine (Gregorio et al., 2013; Guffey et  
226 al., 2011) and is probably associated with intestinal fluid processing via modulation of  
227 epithelial  $\text{HCO}_3^-$  secretion. In the intestine of the Gulf toadfish, the proton pump  
228 constitutes a functional metabolon with the SLC26a6 anion exchanger, that drives  
229 intestinal  $\text{Cl}^-$  uptake against a steep electrochemical gradient (Grosell et al., 2009b) and  
230 enables epithelial competence for  $\text{HCO}_3^-$  secretion. In light of this idea, it was  
231 unsurprising that the regulation of expression of *Atp6v1b* (proton pump beta subunit) in  
232 the anterior intestine of the sea bream paralleled the response to endocrine regulation  
233 described for the SLC26a6 (Figures 4 and 5).

234 In fish intestine, SLC4a4 is located in the basolateral membrane of the enterocyte and is  
235 highly expressed in seawater fish (Kurita et al., 2008). SLC4a4 is a high capacity  $\text{HCO}_3^-$   
236 supply that drives transcellular secretion at the apical membrane of the enterocyte and is  
237 suggested to act as a limiting step of  $\text{HCO}_3^-$  secretion in the intestine of marine fish  
238 (Chang et al., 2012; Taylor et al., 2010). The capacity of calcitropic factors to modulate  
239 the expression of SLC4a4 in the anterior intestine of the sea bream (Figures 4 and 5)  
240 provides evidence that reinforces the relationship between epithelial calcium  
241 movements and  $\text{HCO}_3^-$  secretion in the intestine of marine fish. However, the present  
242 study reveals that the antagonistic action of PTHrP and STC goes beyond calcium  
243 regulation and that they also affect key mechanisms of the intestinal  $\text{HCO}_3^-$  secretion  
244 cascade. In particular the calcitropic hormones had a similar effect on the transcript  
245 abundance of SLC26a3, SLC26a6, SLC4a4 and *Atp6v1b* transporters in the sea bream  
246 intestine and this contrasts with the *ex-vivo* effect of prolactin (Ferlazzo et al., 2012)  
247 where only SLC4a4 transcript abundance was modified in the intestine. The divergence  
248 between PTHrP, STC and PRL action may arise from the experimental approach (*in*  
249 *vivo* vs *ex-vivo*) or may simply reflect the physiological roles and selectivity of these



250 hormones.

251 The intestinal molecular response to hypercalcemic/hypocalcemic treatment established  
252 an important feature; the molecular mechanisms targeted by both calcitropic hormones  
253 in the formation of carbonate precipitates are common. In light of this result the relative  
254 importance, if any, of such regulation in normal physiology could only be accessed *in*  
255 *vivo*. The intestinal fluid and the precipitate fraction were treated as different  
256 compartments, since the fluid acts as an intermediate step between epithelial  $\text{HCO}_3^-$   
257 secretion and the final precipitation in the form of intestinal carbonate precipitates. The  
258 precipitated fraction represented the values as  $\Sigma$ carbonate to account for magnesium  
259 and calcium content of the precipitates (Perry et al., 2011; Woosley et al., 2012). The  
260 endocrine effects observed (Figure 6) were parallel in both fractions and the results  
261 obtained clearly demonstrate the endocrine regulation of intestinal carbonate  
262 precipitation. Hypercalcemic factors reduced the amount of carbonate precipitates e.g  
263 PTHrP(1-34) treatment reduced precipitated carbonates to about 50%, while  
264 immunization with STC antibodies reduced precipitates by about 65%. In contrast,  
265 hypocalcemic factors increased precipitate output: the PTH/PTHrP receptor antagonist  
266 PTHrP(7-34) induced about a 3 fold increase in the precipitate fraction present in the  
267 intestinal lumen.

268 Fish intestinal carbonate precipitate production has a significant (Wilson et al., 2009)  
269 impact in the ocean carbon cycle. Consequently, the characterization of the endogenous  
270 endocrine response to the predicted ocean acidification will be essential to model and  
271 establish the contribution of fish in a changing environment. The present study  
272 demonstrates the predictable effect of the calcitropic hormones STC and PTHrP on the  
273 regulation of intestinal mechanisms related to epithelial  $\text{HCO}_3^-$  secretion, and exposes  
274 the end result on precipitate formation. Assuming that intestinal water absorption and  
275 epithelial  $\text{HCO}_3^-$  are functionally associated (Carvalho et al., 2012; Grosell, 2011;  
276 Tresguerres et al., 2010) the endocrine regulation of epithelial  $\text{HCO}_3^-$  secretion may have  
277 a central role in this process. The endogenous modulation of carbonate precipitation in  
278 the intestine highlights a novel physiological role for calcium-regulating factors and  
279 likely impacts the general osmoregulatory process in marine fish, and may have a global  
280 impact in the ocean carbon cycle.

281

282

## METHODS AND TECHNIQUES

283

### Peptides and chemicals

284 *In vivo* and *in vitro* PTHrP(1-34) and PTHrP(7-34) bioactivity has been previously  
285 reported in fish (Canario et al., 2006; Fuentes et al., 2006; Fuentes et al., 2007a; Fuentes  
286 et al., 2007b; Guerreiro et al., 2001; Rotllant et al., 2005). Stanniocalcin (STC) was  
287 purified from the sea bream *Stannius corpuscles* and bioactivity has been confirmed  
288 using *in vitro* Ussing type chambers (Fuentes et al., 2010). All chemicals were of the  
289 highest grade and obtained from Sigma-Aldrich (Madrid, Spain) unless stated otherwise.

290

291

### Animals

292 Sea bream (*Sparus aurata*) juveniles were obtained from commercial sources  
293 (CUPIMAR SA, Cádiz, Spain) and maintained in open-seawater circuits under natural  
294 conditions of water temperature (18– 20°C), photoperiod, and salinity (37 ppt) at a  
295 density <5 kg/m<sup>3</sup>. For maintenance, fish were fed twice daily to a final ration of 2% of  
296 the body weight, with a commercial sea bream diet (Trow España S.A.; Cojóbar,  
297 Burgos, Spain). All fish were fasted for 24 hours (h) before experimental manipulations.  
298 All animal manipulations were carried out in compliance with the Guidelines of the  
299 European Union Council (86/609/EU) and Portuguese legislation for the use of  
300 laboratory animals. All animal protocols were performed under a Group-1 license from  
301 the Direção-Geral de Veterinária, Ministerio da Agricultura, do Desenvolvimento  
302 Rural e das Pescas, Portugal.

303

304

### STC antibody validation

305 Antibodies were commercially produced in rabbits (Genemed Synthesis, Sigma-Aldrich,  
306 Madrid, Spain) with a triple boost of 1 mg purified native sea bream STC (Fuentes et al.,  
307 2010). All antibody procedures were performed with the neat antiserum and no  
308 purification attempt was made. For tissue and serum collection sea bream (n=4, body  
309 mass 250 g) were anesthetized (2-phenoxyethanol 1:10,000; Sigma-Aldrich, Madrid,  
310 Spain) and blood was obtained by puncture of the caudal peduncle, left to clot on ice  
311 and serum obtained by centrifugation (10,000 rpm for 5 min) and stored at -20°C for  
312 later use. Corpuscles of *Stannius* were dissected out after decapitation of sea bream, and  
313 either fixed in Bouin or flash-frozen in liquid-N<sub>2</sub> and stored at -20°C for later use.

314 SDS-PAGE and Western blot: corpuscles of *Stannius* were homogenized in extraction  
315 buffer (240 mM Tris; 48% glycerol; 13.5% sodium dodecylsulfate (SDS) and total  
316 protein in the extract quantified (Nanodrop 1000, Thermo Scientific, Waltham, MA,  
317 USA). Serum samples (2  $\mu$ l/lane) and purified sea bream STC (800 ng/lane) were  
318 fractioned by SDS-PAGE on 15% polyacrylamide gels under reducing conditions at  
319 100 V and blotted onto enhanced chemiluminescence (ECL) membranes (Hybond-P  
320 PVDF ECL, Amersham Biosciences) in a vertical tank transfer system (Mighty Small  
321 Hoefer, Amersham Pharmacia) for 60 min at 250 mA. The membranes were incubated  
322 with blocking solution [3% (wt/vol) bovine serum albumin (BSA); 0,1% (vol/vol)  
323 Tween 20 in Tris-buffered saline (TBS)] overnight at 4°C. Subsequently, membranes  
324 were washed in TBS-T and incubated for 2 h at room temperature with constant  
325 agitation with either the diluted STC primary antisera (1:50,000 in TBS-T) or antisera  
326 pre-absorbed with an extract of *Stannius* corpuscles. Antibody pre-absorption was  
327 performed overnight at 4°C with an antibody dilution of 1:1,000 in TBS-T in the  
328 presence of an extract of sea bream *Stannius* corpuscles (see above) with total crude  
329 protein 1 $\mu$ g/ml. After incubation with primary antibodies the excess antisera was  
330 removed, and the membranes were washed several times in TBS-T and incubated with a  
331 secondary antibody (anti-rabbit IgG-peroxidase conjugate 1:35,000, Sigma-Aldrich,  
332 Madrid, Spain) for 1 h at room temperature. Excess secondary antibody was removed  
333 and the membranes were washed several times in TBS-T and incubated with  
334 streptavidin-horseradish peroxidase conjugate (GE Healthcare, Amersham) diluted  
335 1:50,000 in TBS-T at room temperature for 1 h. Excess streptavidin was removed;  
336 membranes washed several times in TBS-T and developed using the ECL Prime  
337 Western blotting reagents Kit (GE Healthcare, Amersham) following the  
338 manufacturer's protocol.

339 Immunohistochemistry (IHC): After fixation with Bouin, kidney tissue containing the  
340 *Stannius* corpuscles were rinsed in PBS, dehydrated, embedded in wax, and serial  
341 sagittal sections (5  $\mu$ m thickness) prepared and mounted onto poly-L-lysine coated  
342 slides for subsequent IHC. Prior to antibody incubation, sections were washed with a  
343 solution of PBS (1X), (0.1%) Triton X-100 and 10% sheep serum (Sigma-Aldrich,  
344 Madrid, Spain) for 1 h at room temperature. Slides were incubated overnight at 4°C  
345 with rabbit polyclonal STC antibody (1:2,500 dilution). After washing with PBS (1X,

346 0.1% Triton X-100) the sections were incubated overnight at 4°C with a secondary  
347 antibody [goat anti-rabbit IgG H-R Hyligh-488 (1:400 dilution, AnaSpec, Fremont, CA,  
348 USA)] and then washed in PBS (1X, 0.1% Triton X-100), and mounted with  
349 VectaShield (Vector Labs, Burlingame, CA, USA). Fluorescent microscopy images  
350 were captured using a Zeiss Z2 Axioscope fluorescent microscope coupled to a Zeiss  
351 HR camera. Preliminary testing was conducted to optimize anti-STC dilution. None of  
352 the negative controls (normal host sera, omission of primary antibody) gave a signal.

353

354

### **Plasma calcium and intestinal transporter expression**

355 Unfed sea bream (n = 80, body mass 2.5 - 3.5 g) were anaesthetized in 2-  
356 phenoxyethanol (1:10,000; Sigma-Aldrich, Madrid, Spain) and weighed to the nearest  
357 0.1 g.

358 In a first experiment fish received a single intraperitoneal injections of, pre-immune  
359 rabbit antiserum (5  $\mu\text{l.g}^{-1}$ ) PTHrP 1–34 (0.5  $\mu\text{g.g}^{-1}$ ), rabbit STCAb (5  $\mu\text{l.g}^{-1}$ ) and a  
360 combination of PTHrP 1–34 (0.5  $\mu\text{g.g}^{-1}$ ) + STCAb (5  $\mu\text{l.g}^{-1}$ ). In a second experiment  
361 fish were injected with 0.9% NaCl (5  $\mu\text{l.g}^{-1}$ ), PTHrP 7–34 (0.5  $\mu\text{g.g}^{-1}$ ), purified sea  
362 bream STC (5  $\mu\text{g.g}^{-1}$ ), or a combination of PTHrP 7–34 (0.5  $\mu\text{g.g}^{-1}$ ) + purified sea  
363 bream STC (sbSTC, 5  $\mu\text{g.g}^{-1}$ ). Final injection volumes were of 5  $\mu\text{l.g}^{-1}$  in all treatments.  
364 Dosages for PTHrP 1-34 and PTHrP 7-34 (receptor antagonist) used in the present  
365 study were based on those previously used in sea bream juveniles (Fuentes et al., 2007a).  
366 After injection fish were transferred to 60 L tanks with flowing seawater for recovery.  
367 Twenty-four hours after injection fish were anesthetized with a terminal dose of 2-  
368 phenoxyethanol (1:1,000) and blood samples were collected into heparinized glass  
369 capillaries from the caudal peduncle after severing the tail. Plasma was obtained by  
370 centrifugation of whole blood (10,000 rpm for 5 min), and stored at -20°C for later  
371 analysis.

372 After decapitation of fish samples from the anterior intestine, which corresponds to a  
373 section 1-1.5 cm in length caudal to the point of insertion of pyloric caeca, were  
374 collected from individual fish and incubated overnight in *RNALater* (Ambion, Austin,  
375 TX, USA) at 4°C and stored at -20°C until utilized for RNA extraction (within 2 weeks).  
376 Plasma calcium levels were determined in duplicate using a commercial calcium kit  
377 (Spinreact, Girona, Spain) with a Benchmark Microplate Reader (Bio-Rad, USA).

378 Total RNA was extracted from samples of the anterior intestine with a Total RNA Kit I  
379 (E.Z.N.A, Omega Bio-tek, Norcross, GA, USA) and the quantity and quality of RNA  
380 assessed (Nanodrop 1000, Thermo Scientific, Waltham, MA, USA). Prior to cDNA  
381 synthesis RNA was treated with DNase using a DNA-free Kit (Ambion, Austin, TX,  
382 USA) following the manufacturer's instructions. Reverse transcription of RNA into  
383 cDNA was carried out using the RevertAid First Strand cDNA Synthesis Kit  
384 (Fermentas, Thermo Scientific) with 500 ng of total RNA in a reaction volume of 20  $\mu$ l.  
385 Primers and reaction conditions followed those previously described (Ferlazzo et al.,  
386 2012; Gregorio et al., 2013). Table 1 shows primer sequences and predicted amplicon  
387 sizes. Real-time qPCR amplifications were performed in duplicate in a final volume of  
388 10  $\mu$ l with 5  $\mu$ l SsoFast EvaGreen Supermix (Bio-Rad, Hercules, CA, USA) as the  
389 reporter dye, 20 ng cDNA, and 0.5 pM/ $\mu$ l of each forward and reverse primers.  
390 Amplifications were performed in 96-well plates using the *One-step Plus* sequence  
391 detection system (Applied Biosystems, Foster City, CA, USA) with the following  
392 protocol: denaturation and enzyme activation step at 95°C for 2 min, followed by 40  
393 cycles of 95°C for 5 sec and 60°C for 10 sec. After the amplification phase, a  
394 temperature-determining dissociation step was carried out at 65°C for 15 s, and 95°C  
395 for 15 s. For normalization of cDNA loading, all samples were run in parallel using 18S  
396 ribosomal RNA (*18S*). To estimate efficiencies, a standard curve was generated for each  
397 primer pair from 10-fold serial dilutions (from 10 to 0.001 ng) from a cDNA pool that  
398 included all samples. Standard curves represented the cycle threshold value as a  
399 function of the logarithm of the number of copies generated, defined arbitrarily as one  
400 copy for the most diluted standard. All calibration curves exhibited correlation  
401 coefficients  $R^2 > 0.98$ , and the corresponding real-time PCR efficiencies were  $>99\%$ .

402  
403

#### **Endocrine effects on intestinal contents**

404 The experiment was designed to test the effect of PTHrP (1-34), PTHrP (7-34), and the  
405 polyclonal sea bream antibody STCAb in the luminal fluid contents of the sea bream.  
406 STC was not tested as insufficient quantities were available.

407 Sea bream juveniles (n=36, body mass 20-25 g) were anaesthetized in 2-  
408 phenoxyethanol (1:10,000) weighed to the nearest 0.1 g and received a single  
409 intraperitoneal injection of 0.9% NaCl (5 $\mu$ l.g<sup>-1</sup>, Control), PTHrP 1-34 (0.5  $\mu$ g.g<sup>-1</sup>),

410 PTHrP 7–34 ( $0.5 \mu\text{g}\cdot\text{g}^{-1}$ ) or STCAb ( $5 \mu\text{l}\cdot\text{g}^{-1}$ ). Individual control groups (0.9% NaCl  
411 injected) were run in parallel with each hormone treatment. After injection fish were  
412 transferred for recovery to 150-liter tanks supplied with well-aerated running seawater.  
413 Twenty-four hours after treatment, fish were anesthetized with 2-phenoxyethanol  
414 (1:1000) and decapitated. The intestinal fluid of individual fish was collected from the  
415 excised intestinal tract clamped (from pyloric caeca to anal sphincter) with two  
416 mosquito forceps, and emptied into pre-weighed vials and centrifuged ( $12,000\text{g}$ , 5 min)  
417 to separate fluid from precipitate.

418 The intestinal fluid was transferred to pre-weighted vials and volume measured to the  
419 nearest  $0.1 \mu\text{l}$  ( $0.1 \text{mg}$  assuming a density of 1). Intestinal fluid titrable alkalinity  
420 ( $\text{HCO}_3^- + \text{CO}_3^{2-}$ ) was manually measured using the double titration method and a  
421 combination semi-micro pH electrode (HI1330B, Hanna Instruments) attached to a pH-  
422 meter (PHM84, Radiometer Copenhagen) as follows:  $50 \mu\text{l}$  of the intestinal fluid  
423 samples were diluted in 10 ml NaCl (40 mM), gassed with  $\text{CO}_2$  free gas for 30 min to  
424 remove  $\text{CO}_2$  and titrated to pH 3.8 with 10 mM HCl, an additional gassing period of 20  
425 min was applied to remove any remaining  $\text{CO}_2$  and the sample was back titrated to its  
426 original pH with 10 mM NaOH. The volume difference between added acid and base in  
427 both titrations and titrant molarities were used to calculate total  $\text{HCO}_3^-$  equivalents  
428 (mEq/l). Intestinal precipitates were re-suspended in  $400 \mu\text{l}$  of triple distilled water,  
429 homogenized with a glass in glass homogenizer and a  $100 \mu\text{l}$  aliquot was double titrated  
430 as described for the intestinal fluid and normalized by fish mass and expressed as nEq/g.

431

432

### Statistics

433 All results are shown as mean  $\pm$  standard error of the mean (Mean  $\pm$  SEM). After  
434 assessing homogeneity of variance and normality statistical analysis of the data was  
435 carried out using as appropriate Student t-test or one-way analysis of variance followed  
436 by the post hoc Bonferroni test to establish differences from control groups. All  
437 statistical analyses were performed using GraphPad Prism version 5.00 for Macintosh  
438 (GraphPad Software, San Diego, CA, USA). Groups were considered significantly  
439 different for  $p < 0.05$ .

440

441

442

## ACKNOWLEDGMENTS

443 The authors acknowledge Ramalhete Marine Station (CCMar, University of Algarve,  
444 Portugal) for fish maintenance and Professor JM Mancera (University of Cadiz, Spain)  
445 for access to sea bream fry.

446

447

## FUNDING

448 Supported by the Portuguese Foundation for Science and Technology (Ministry of  
449 Science and Higher Education, Portugal and European Social Funds) through grants  
450 [PTDC/MAR/104008/2008] and [PTDC/MAR-BIO/3811/2012] to JF and post-doctoral  
451 support [SFRH/BPD/66808/2009] to MAC.

452

453

## REFERENCES

454 **Amemiya, Y., Irwin, D. M. and Youson, J. H.** (2006). Cloning of  
455 stanniocalcin (STC) cDNAs of divergent teleost species: Monomeric STC supports  
456 monophyly of the ancient teleosts, the osteoglossomorphs. *General and Comparative*  
457 *Endocrinology* **149**, 100-7.

458 **Amemiya, Y., Marra, L. E., Reyhani, N. and Youson, J. H.** (2002).  
459 Stanniocalcin from an ancient teleost: a monomeric form of the hormone and a possible  
460 extracorporeal distribution. *Molecular and cellular endocrinology* **188**, 141-50.

461 **Ando, M. and Subramanyan, V. V.** (1990). Bicarbonate transport systems in  
462 the intestine of the seawater eel. *Journal of Experimental Biology* **150**, 381-394.

463 **Canario, A. V. M., Rotllant, J., Fuentes, J., Guerreiro, P. M., Teodosio, H.**  
464 **R., Power, D. M. and Clark, M. S.** (2006). Novel bioactive parathyroid hormone and  
465 related peptides in teleost fish. *Febs Letters* **580**, 291-299.

466 **Carvalho, E. S., Gregorio, S. F., Power, D. M., Canario, A. V. and Fuentes,**  
467 **J.** (2012). Water absorption and bicarbonate secretion in the intestine of the sea bream  
468 are regulated by transmembrane and soluble adenylyl cyclase stimulation. *Journal of*  
469 *Comparative Physiology B: Biochemical, Systemic, and Environmental Physiology* **182**,  
470 1069-80.

471 **Chang, M. H., Plata, C., Kurita, Y., Kato, A., Hirose, S. and Romero, M. F.**  
472 (2012). Euryhaline pufferfish NBCe1 differs from nonmarine species NBCe1  
473 physiology. *American Journal of Physiology-Cell Physiology* **302**, C1083-C1095.

474 **Evans, D. H., Piermarini, P. M. and Choe, K. P.** (2005). The multifunctional  
475 fish gill: Dominant site of gas exchange, osmoregulation, acid-base regulation, and  
476 excretion of nitrogenous waste. *Physiological Reviews* **85**, 97-177.

477 **Fenwick, J. C. and Flik, G.** (1995). A passive immunization technique against  
478 the Teleost hypocalcemic hormone Stanniocalcin provides evidence for the cholinergic  
479 control of Stanniocalcin release and the conserved nature of the molecule. *General and*  
480 *Comparative Endocrinology* **98**, 202-210.

481 **Ferlazzo, A., Carvalho, E. S., Gregorio, S. F., Power, D. M., Canario, A. V.,**  
482 **Trischitta, F. and Fuentes, J.** (2012). Prolactin regulates luminal bicarbonate secretion  
483 in the intestine of the sea bream (*Sparus aurata* L.). *Journal of Experimental Biology*  
484 **215**, 3836-44.

- 485 **Fuentes, J., Bury, N. R., Carroll, S. and Eddy, F. B.** (1996). Drinking in  
486 Atlantic salmon psmolts (*Salmo solar* L.) and juvenile rainbow trout (*Oncorhynchus*  
487 *mykiss* Walbaum) in response to cortisol and sea water challenge. *Aquaculture* **141**,  
488 129-137.
- 489 **Fuentes, J. and Eddy, F. B.** (1997a). Drinking in marine, euryhaline and  
490 freshwater teleost fish. In *Ionic regulation in animals*, eds. N. Hazon F. B. Eddy and G.  
491 Flik), pp. 135-149. Heidelberg: Springer-Verlag.
- 492 **Fuentes, J. and Eddy, F. B.** (1997b). Effect of manipulation of the renin-  
493 angiotensin system in control of drinking in juvenile Atlantic salmon (*Salmo salar* L) in  
494 fresh water and after transfer to sea water. *Journal of Comparative Physiology B:*  
495 *Biochemical, Systemic, and Environmental Physiology* **167**, 438-443.
- 496 **Fuentes, J., Figueiredo, J., Power, D. M. and Canario, A. V. M.** (2006).  
497 Parathyroid hormone-related protein regulates intestinal calcium transport in sea bream  
498 (*Sparus auratus*). *American Journal of Physiology-Regulatory Integrative and*  
499 *Comparative Physiology* **291**, R1499-R1506.
- 500 **Fuentes, J., Guerreiro, P. M., Modesto, T., Rotllant, J., Canario, A. V. M.**  
501 **and Power, D. M.** (2007a). A PTH/PTHrP receptor antagonist blocks the  
502 hypercalcemic response to estradiol-17  $\beta$ . *American Journal of Physiology - Regulatory,*  
503 *Integrative and Comparative Physiology* **293**, R956-R960.
- 504 **Fuentes, J., Haond, C., Guerreiro, P. M., Silva, N., Power, D. M. and**  
505 **Canario, A. V. M.** (2007b). Regulation of calcium balance in the sturgeon *Acipenser*  
506 *naccarii*: a role for PTHrP. *American Journal of Physiology-Regulatory Integrative and*  
507 *Comparative Physiology* **293**, R884-R893.
- 508 **Fuentes, J., Power, D. M. and Canario, A. V. M.** (2010). Parathyroid  
509 hormone-related protein-stanniocalcin antagonism in regulation of bicarbonate secretion  
510 and calcium precipitation in a marine fish intestine. *American Journal of Physiology-*  
511 *Regulatory Integrative and Comparative Physiology* **299**, R150-R158.
- 512 **Genz, J., McDonald, M. D. and Grosell, M.** (2011). Concentration of MgSO<sub>4</sub>  
513 in the intestinal lumen of *Opsanus beta* limits osmoregulation in response to acute  
514 hypersalinity stress. *American Journal of Physiology-Regulatory Integrative and*  
515 *Comparative Physiology* **300**, R895-R909.
- 516 **Gregorio, S. F., Carvalho, E. S., Encarnacao, S., Wilson, J. M., Power, D.**  
517 **M., Canario, A. V. and Fuentes, J.** (2013). Adaptation to different salinities exposes  
518 functional specialization in the intestine of the sea bream (*Sparus aurata* L.). *Journal of*  
519 *Experimental Biology* **216**, 470-9.
- 520 **Grosell, M.** (2006). Intestinal anion exchange in marine fish osmoregulation.  
521 *Journal of Experimental Biology* **209**, 2813-2827.
- 522 **Grosell, M.** (2011). Intestinal anion exchange in marine teleosts is involved in  
523 osmoregulation and contributes to the oceanic inorganic carbon cycle. *Acta*  
524 *Physiologica* **202**, 421-434.
- 525 **Grosell, M. and Genz, J.** (2006). Ouabain-sensitive bicarbonate secretion and  
526 acid absorption by the marine teleost fish intestine play a role in osmoregulation.  
527 *American Journal of Physiology-Regulatory Integrative and Comparative Physiology*  
528 **291**, R1145-R1156.
- 529 **Grosell, M., Genz, J., Taylor, J. R., Perry, S. F. and Gilmour, K. M.** (2009a).  
530 The involvement of H<sup>+</sup>-ATPase and carbonic anhydrase in intestinal HCO<sub>3</sub><sup>-</sup> secretion in  
531 seawater-acclimated rainbow trout. *Journal of Experimental Biology* **212**, 1940-1948.



- 532 **Grosell, M., Laliberte, C. N., Wood, S., Jensen, F. B. and Wood, C. M.**  
 533 (2001). Intestinal HCO<sub>3</sub><sup>-</sup> secretion in marine teleost fish: evidence for an apical rather  
 534 than a basolateral Cl<sup>-</sup>/HCO<sub>3</sub><sup>-</sup> exchanger. *Fish Physiology and Biochemistry* **24**, 81-95.
- 535 **Grosell, M., Mager, E. M., Williams, C. and Taylor, J. R.** (2009b). High rates  
 536 of HCO<sub>3</sub><sup>-</sup> secretion and Cl<sup>-</sup> absorption against adverse gradients in the marine teleost  
 537 intestine: the involvement of an electrogenic anion exchanger and H<sup>+</sup>-pump metabolon?  
 538 *Journal of Experimental Biology* **212**, 1684-96.
- 539 **Grosell, M., Wood, C. M., Wilson, R. W., Bury, N. R., Hogstrand, C.,**  
 540 **Rankin, C. and Jensen, F. B.** (2005). Bicarbonate secretion plays a role in chloride and  
 541 water absorption of the European flounder intestine. *American Journal of Physiology-*  
 542 *Regulatory Integrative and Comparative Physiology* **288**, R936-R946.
- 543 **Guerreiro, P. M., Fuentes, J., Flik, G., Rotllant, J., Power, D. M. and**  
 544 **Canario, A. V. M.** (2004). Water calcium concentration modifies whole-body calcium  
 545 uptake in sea bream larvae during short-term adaptation to altered salinities. *Journal of*  
 546 *Experimental Biology* **207**, 645-653.
- 547 **Guerreiro, P. M., Fuentes, J., Power, D. M., Ingleton, P. M., Flik, G. and**  
 548 **Canario, A. V.** (2001). Parathyroid hormone-related protein: a calcium regulatory  
 549 factor in sea bream (*Sparus aurata* L.) larvae. *American Journal of Physiology-*  
 550 *Regulatory Integrative and Comparative Physiology* **281**, R855-R860.
- 551 **Guffey, S., Esbaugh, A. J. and Grosell, M.** (2011). Regulation of apical H<sup>+</sup>-  
 552 ATPase activity and intestinal HCO<sub>3</sub><sup>-</sup> secretion in marine fish osmoregulation.  
 553 *American journal of physiology. Regulatory, Integrative and Comparative Physiology*  
 554 **301**, R1682-R1691.
- 555 **Hirano, T. and Mayer-Gostan, N.** (1976). Eel esophagus as an osmoregulatory  
 556 organ. *Proceedings of the National Academy of Sciences of the United States of*  
 557 *America* **73**, 1348-1350.
- 558 **Kurita, Y., Nakada, T., Kato, A., Doi, H., Mistry, A. C., Chang, M. H.,**  
 559 **Romero, M. F. and Hirose, S.** (2008). Identification of intestinal bicarbonate  
 560 transporters involved in formation of carbonate precipitates to stimulate water  
 561 absorption in marine teleost fish. *American Journal of Physiology-Regulatory*  
 562 *Integrative and Comparative Physiology* **294**, R1402-R1412.
- 563 **Mayer-Gostan, N., Flik, G. and Pang, P. T.** (1992). An enzyme-linked-  
 564 immunosorbent-assay for Stanniocalcin, a major hypocalcemic hormone in Teleost.  
 565 *General and Comparative Endocrinology* **86**, 10-19.
- 566 **Mount, D. B. and Romero, M. F.** (2004). The SLC26 gene family of  
 567 multifunctional anion exchangers. *Pflugers Archiv-European Journal of Physiology* **447**,  
 568 710-721.
- 569 **Parmelee, J. T. and Renfro, J. L.** (1983). Esophageal desalination of seawater  
 570 in Flounder - Role of active sodium-transport. *American Journal of Physiology* **245**,  
 571 R888-R893.
- 572 **Perry, C. T., Salter, M. A., Harborne, A. R., Crowley, S. F., Jelks, H. L. and**  
 573 **Wilson, R. W.** (2011). Fish as major carbonate mud producers and missing components  
 574 of the tropical carbonate factory. *Proceedings of the National Academy of Sciences of*  
 575 *the United States of America* **108**, 3865-3869.
- 576 **Rotllant, J., Guerreiro, P. M., Anjos, L., Redruello, B., Canario, A. V. M.**  
 577 **and Power, D. M.** (2005). Stimulation of cortisol release by the N terminus of teleost  
 578 parathyroid hormone-related protein in interrenal cells in vitro. *Endocrinology* **146**, 71-  
 579 76.

- 580 **Taylor, J. R., Mager, E. M. and Grosell, M.** (2010). Basolateral NBCe1 plays  
581 a rate-limiting role in transepithelial intestinal  $\text{HCO}_3^-$  secretion, contributing to marine  
582 fish osmoregulation. *Journal of Experimental Biology* **213**, 459-468.
- 583 **Tresguerres, M., Levin, L. R., Buck, J. and Grosell, M.** (2010). Modulation  
584 of NaCl absorption by  $[\text{HCO}_3^-]$  in the marine teleost intestine is mediated by soluble  
585 adenylyl cyclase. *American Journal of Physiology-Regulatory Integrative and*  
586 *Comparative Physiology* **299**, R62-R71.
- 587 **Walsh, P. J., Blackwelder, P., Gill, K. A., Danulat, E. and Mommsen, T. P.**  
588 (1991). Carbonate deposits in marine fish intestines - a new source of biomineralization.  
589 *Limnology and Oceanography* **36**, 1227-1232.
- 590 **Wilson, R., Gilmour, K., Henry, R. and Wood, C.** (1996). Intestinal base  
591 excretion in the seawater-adapted rainbow trout: a role in acid-base balance? *Journal of*  
592 *Experimental Biology* **199**, 2331-43.
- 593 **Wilson, R. W., Millero, F. J., Taylor, J. R., Walsh, P. J., Christensen, V.,**  
594 **Jennings, S. and Grosell, M.** (2009). Contribution of fish to the marine inorganic  
595 carbon cycle. *Science* **323**, 359-62.
- 596 **Wilson, R. W., Wilson, J. M. and Grosell, M.** (2002). Intestinal bicarbonate  
597 secretion by marine teleost fish - why and how? *Biochimica Et Biophysica Acta-*  
598 *Biomembranes* **1566**, 182-193.
- 599 **Wosley, R. J., Millero, F. J. and Grosell, M.** (2012). The solubility of fish-  
600 produced high magnesium calcite in seawater. *Journal of Geophysical Research-*  
601 *Oceans* **117**.  
602

603 **Table 1. Primers for qPCR**

| Gene             | Primer | Sequence (5' to 3')   | Tm (°C) | Size (bp) |
|------------------|--------|-----------------------|---------|-----------|
| <b>Slc26a3.B</b> | F      | ATCTCGGCTCTGAAGGGACT  | 60      | 162       |
|                  | R      | GAGCATTCTGTCCCTGCTC   |         |           |
| <b>Slc26a6.A</b> | F      | GCGGGACTGTTCAGCGGAGG  | 60      | 176       |
|                  | R      | TGCGAACACGCCTGAACGGCA |         |           |
| <b>Slc4a4.A</b>  | F      | ACCTTCATGCCACCGCAGGG  | 60      | 128       |
|                  | R      | CGCCGCCGCCGATAACTCTT  |         |           |
| <b>Atp6v1b</b>   | F      | TGTCTGCCTTTTCCTGAACC  | 60      | 180       |
|                  | R      | TGGGGATCTGGGTGATAGAG  |         |           |
| <b>18S</b>       | F      | AACCAGACAAATCGCTCCAC  | 60      | 139       |
|                  | R      | CCTGCGGCTTAATTTGACTC  |         |           |

604

605 **FIGURE LEGENDS**

606 **Figure 1. Left:** Protein profile of a Coomassie blue-stained acrylamide gel (left) of sea  
607 bream serum (Ser) and purified sea bream stanniocalcin (STC). **Center:** Western blot  
608 (WB) using antisera (1:50,000) raised against purified sea bream stanniocalcin revealing  
609 a single immunoreactive band in the serum. **Right:** Decreased signal in WB using pre-  
610 absorbed antisera (WB pre-absorbed) with an extract of sea bream Stannius corpuscles  
611 (see MATERIALS AND METHODS for further details).

612

613 **Figure 2.** Immuno-localization of stanniocalcin in serial sections of sea bream kidney  
614 and Stannius corpuscles (see MATERIALS AND METHODS for further details).  
615 Merge (A, D), Green/488 (B, E) and bright field (C, F). Note that positive STC signal is  
616 limited to the Stannius corpuscles and appears with highest intensity in the center of the  
617 glands. Scale bars: A, B and C 100  $\mu\text{m}$ ; D, E and F 10  $\mu\text{m}$ . Black arrowhead in C  
618 indicates the position of a Stannius Corpuscle.

619

620 **Figure 3.** Plasma calcium levels ( $\text{mmol.L}^{-1}$ ) in sea bream juveniles in response to a  
621 single intra-peritoneal injection of: **A)** Rabbit pre-immune serum (C, Control),  
622 PTHrP(1–34), rabbit anti-sea bream stanniocalcin antiserum (STC-Ab) or a  
623 combination of PTHrP(1–34)+STC-Ab. **B)** saline (C, Control), PTHrP 7–34, purified  
624 sea bream stanniocalcin (STC) or a combination of PTHrP 7–34+STC. Each column  
625 represents the means  $\pm$ SEM ( $n=6-8$ ). Asterisks indicate significant differences ( $P <$   
626  $0.05$ ) from corresponding control groups.

627

628 **Figure 4.** Relative expression (arbitrary units, gene of interest/18s) of *Slc4a4*, beta  
629 subunit of the V-type proton pump (*Atp6v1b*), *Slc26a3* and *Slc26a6* in the anterior  
630 intestine of sea bream juveniles in response to a single intra-peritoneal injection of  
631 rabbit pre-immune serum (C, Control), PTHrP(1–34), rabbit anti-sea bream  
632 stanniocalcin antiserum (STC-Ab) or a combination of PTHrP(1–34)+STC-Ab. Each  
633 column represents the mean  $\pm$  SEM ( $n=7-8$ ). Asterisks indicate significant differences  
634 ( $P < 0.05$ ) from the corresponding control groups.

635

636 **Figure 5.** Relative expression (arbitrary units, gene of interest/18s) of *Slc4a4*, beta  
637 subunit of the V-type proton pump (*Atp6v1b*), *Slc26a3* and *Slc26a6* in the anterior  
638 intestine of sea bream juveniles in response to a single intra-peritoneal injection of  
639 saline (C, Control), PTHrP 7–34, purified sea bream stanniocalcin (STC) or a  
640 combination of PTHrP 7–34+STC. Each column represent means  $\pm$  SEM ( $n=6-8$ ).  
641 Asterisks indicate significant differences ( $P < 0.05$ ) from the corresponding control  
642 groups.

643

644 **Figure 6.** Intestinal fluid total  $\text{HCO}_3^-$  (mEq/L; left axis) and intestinal precipitate  $\Sigma$   
645 carbonates ( $\text{CaCO}_3 + \text{MgCO}_3$ , nEq/g body mass; right axis) in response to a single  
646 intra-peritoneal injection of saline (Control), PTHrP(1–34) or rabbit anti-sea bream  
647 stanniocalcin antiserum (STC-Ab). Each column represents the mean  $\pm$  SEM ( $n=5-7$ ).  
648 Asterisks indicate significant differences ( $P < 0.05$ ) from corresponding control groups.

649

626 **FIGURE LEGENDS**

627 **Figure 1. Left:** Protein profile of a Coomassie blue-stained acrylamide gel (left) of sea  
628 bream serum (Ser) and purified sea bream stanniocalcin (STC). **Center:** Western blot  
629 (WB) using antisera (1:50,000) raised against purified sea bream stanniocalcin revealing  
630 a single immunoreactive band in the serum. **Right:** Decreased signal in WB using pre-  
631 absorbed antisera (WB pre-absorbed) with an extract of sea bream Corpuscles of  
632 Stannius (see MATERIALS AND METHODS for further details).

633

634 **Figure 2.** Immuno-localization of stanniocalcin in thin sections of sea bream kidney and  
635 corpuscle of Stannius (see MATERIALS AND METHODS for further details). Merge  
636 (A, D), Green/488 (B, E) and bright field (C, F). Note that signal is limited to the  
637 Stannius bodies and appears with highest intensity in the center of the glands. Scale  
638 bars: A, B and C 100  $\mu\text{m}$ ; D, E and F 10  $\mu\text{m}$ . Black arrowhead in C indicates the  
639 position of a corpuscle of Stannius.

640

641 **Figure 3.** Plasma calcium levels ( $\text{mmol.L}^{-1}$ ) in sea bream juveniles in response to single  
642 intra-peritoneal injections of: **A)** Rabbit pre-immune serum (C, Control), PTHrP(1–34),  
643 rabbit antiseabream stanniocalcin antiserum (STC-Ab) or a combination PTHrP(1–  
644 34)+STC-Ab. **B)** saline (C, Control), PTHrP 7–34, purified sea bream stanniocalcin  
645 (STC) or a combination of PTHrP 7–34+STC. Each column represent means  $\pm$ SEM  
646 ( $n=6-8$ ). Asterisks represent significant differences ( $P < 0.05$ ) from corresponding  
647 control groups.

648

649 **Figure 4.** Relative expression (arbitrary units, gene of interest/18s) of *Slc4a4*, beta  
650 subunit of the V-type proton pump (*Atp6v1b*), *Slc26a3* and *Slc26a6* in the anterior  
651 intestine of sea bream juveniles in response to single intra-peritoneal injections of rabbit  
652 pre-immune serum (C, Control), PTHrP(1–34), rabbit anti-sea bream stanniocalcin  
653 antiserum (STC-Ab) or a combination PTHrP(1–34)+STC-Ab. Each column represents  
654 mean  $\pm$  SEM ( $n=7-8$ ). Asterisks represent significant differences ( $P < 0.05$ ) from  
655 corresponding control groups.

656

657 **Figure 5.** Relative expression (arbitrary units, gene of interest/18s) of *Slc4a4*, beta  
658 subunit of the V-type proton pump (*Atp6v1b*), *Slc26a3* and *Slc26a6* in the anterior  
659 intestine of sea bream juveniles in response in response to single intra-peritoneal  
660 injections of saline (C, Control), PTHrP 7–34, purified sea bream stanniocalcin (STC)  
661 or a combination of PTHrP 7–34+STC. Each column represent means  $\pm$ SEM ( $n=6-8$ ).  
662 Asterisks represent significant differences ( $P < 0.05$ ) from corresponding control groups.  
663

664 **Figure 6.** Intestinal fluid total  $\text{HCO}_3^-$  (mEquiv/L; left axis) and intestinal aggregate  $\Sigma$   
665 carbonates ( $\text{CaCO}_3 + \text{MgCO}_3$ , nEquiv/g body mass; right axis) in response to single  
666 intra-peritoneal injections of saline (Control), PTHrP(1–34) or rabbit anti-sea bream  
667 stanniocalcin antiserum (STC-Ab). Each column represents mean  $\pm$  SEM ( $n=5-7$ ).  
668 Asterisks represent significant differences ( $P < 0.05$ ) from corresponding control groups.  
669

670 **Figure 1. Gregorio *et al.***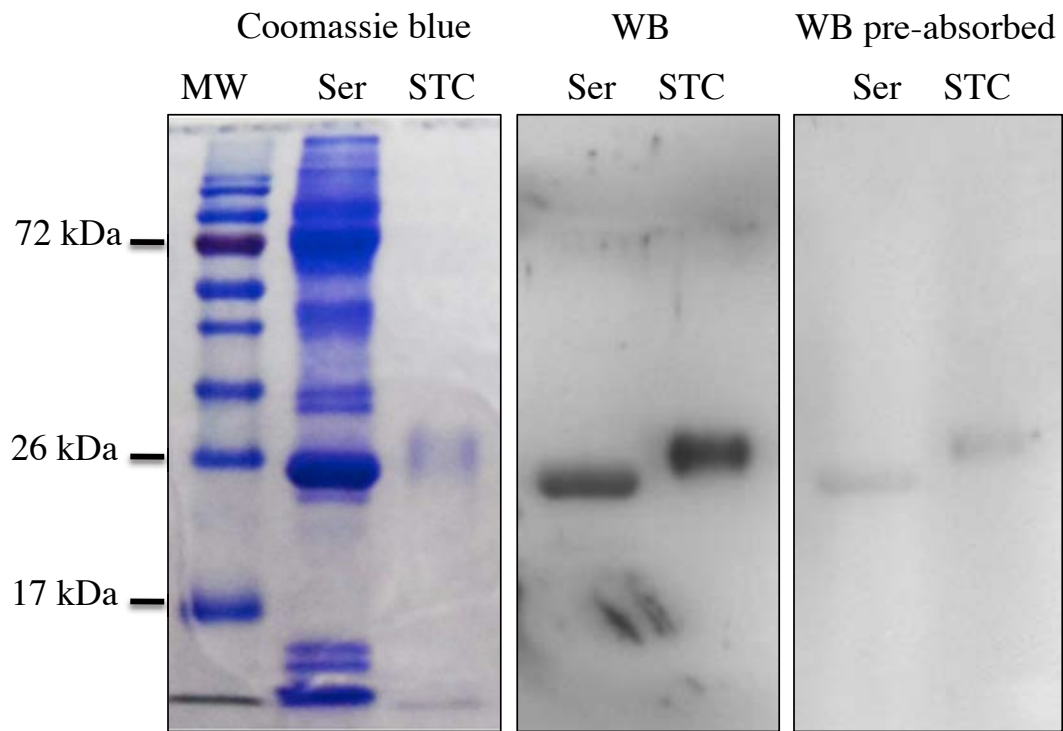

671



672 **Figure 2. Gregorio *et al.***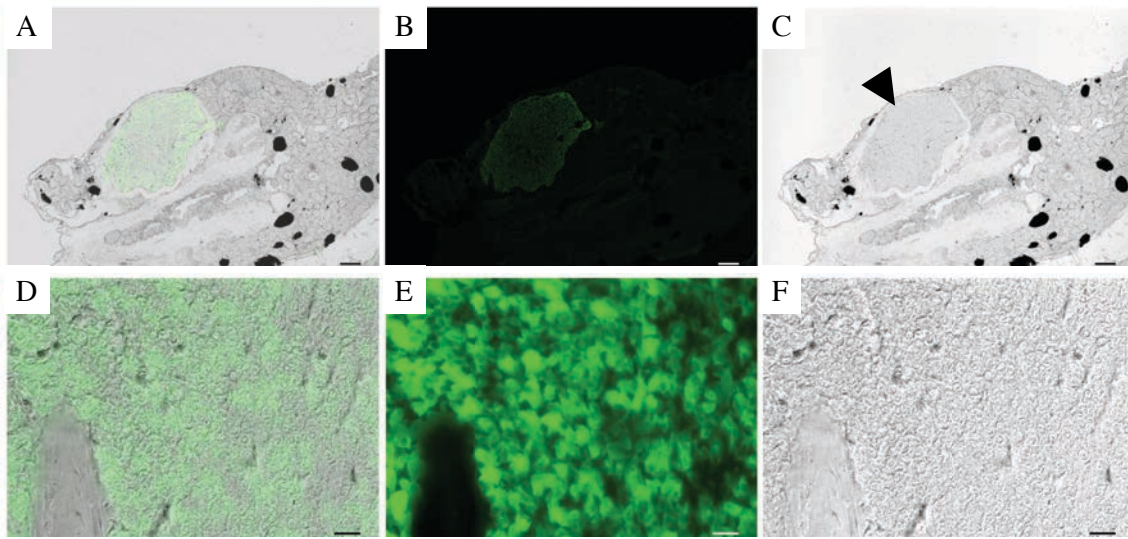673  
674

675 **Figure 3.** Gregorio *et al.*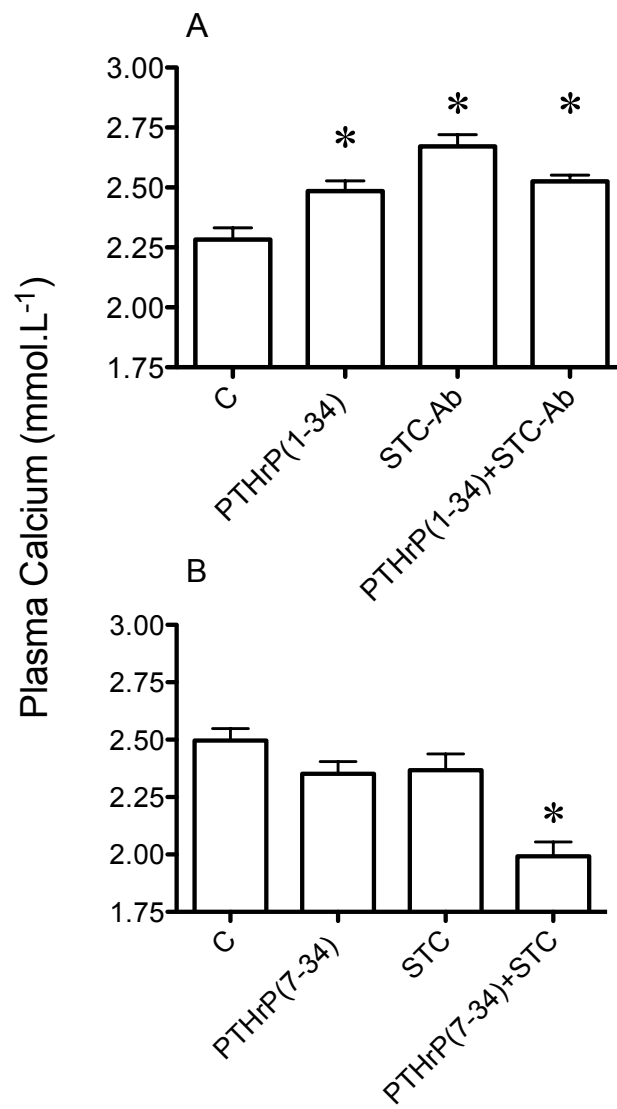676  
677

678 Figure 4. Gregorio *et al.*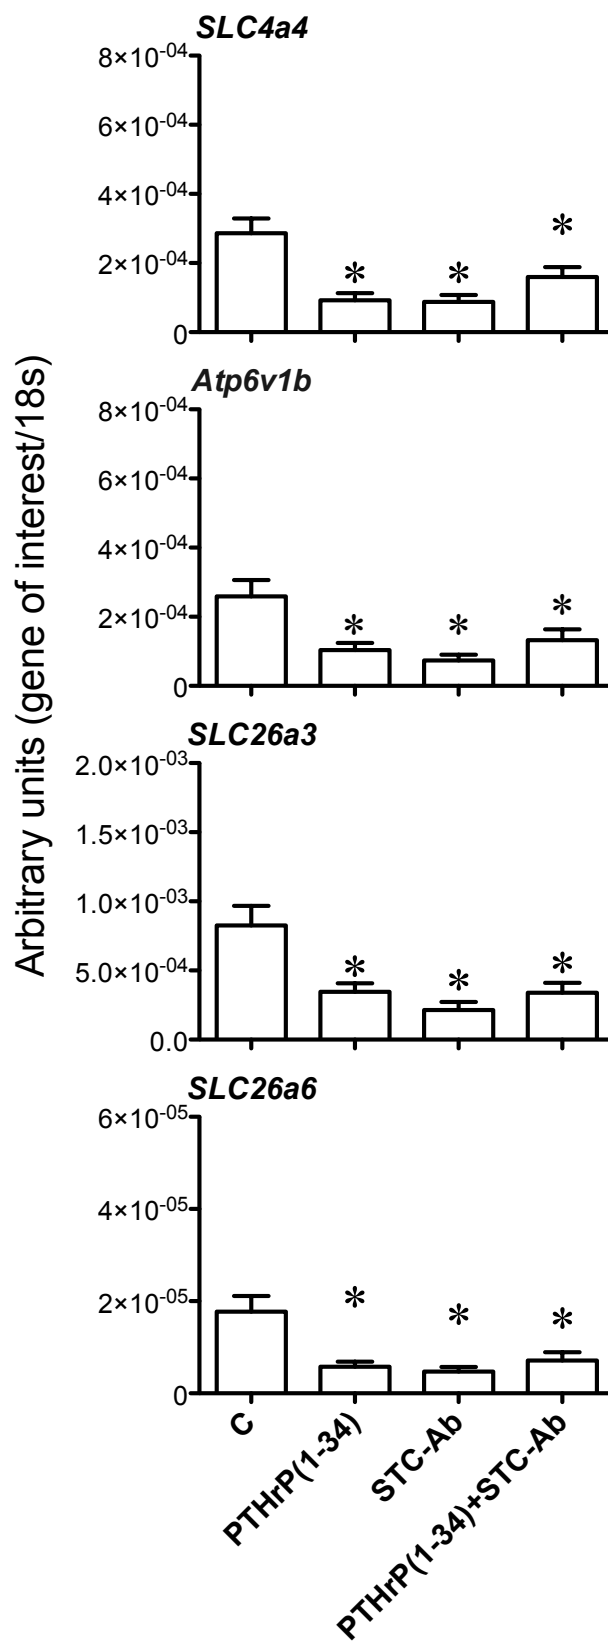679  
680

681 Figure 5. Gregorio *et al.*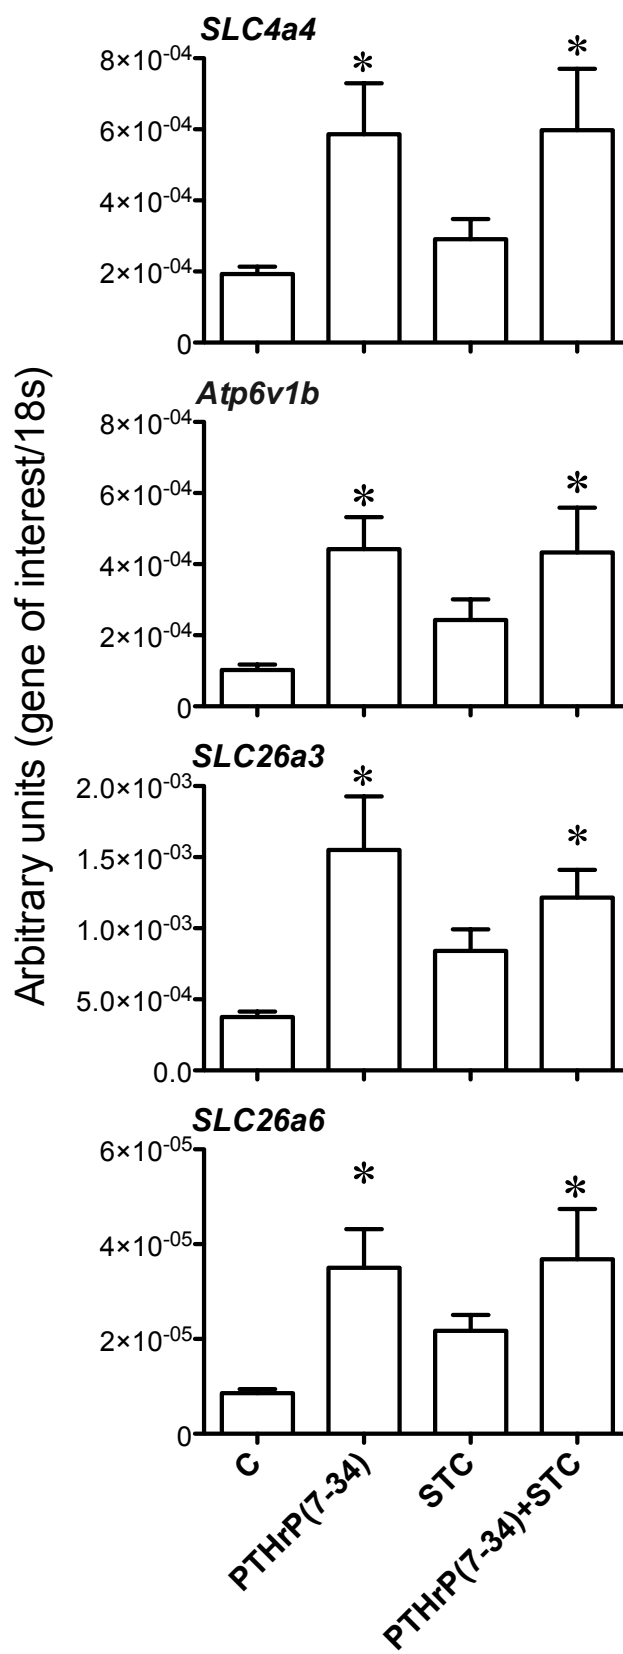682  
683

684 **Figure 6. Gregorio *et al.***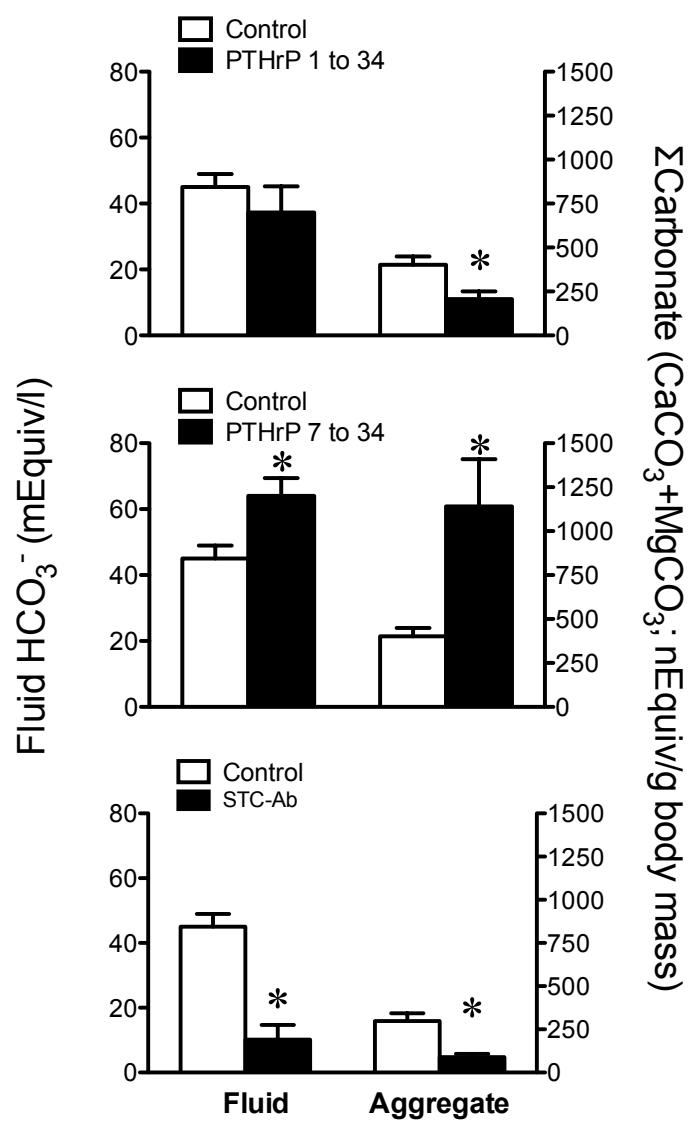

685
